# Supplementary material for: Water retting process with hemp pre-treatment: effect on the enzymatic activities and microbial populations dynamic
Source: Springer Nature journal article supplement (doi:10.1007/s00253-024-13300-5), 2024-09-13
Supplement: MOESM1 [file 253_2024_13300_MOESM1_ESM.pdf]

## Supplemental material

### Applied Microbiology and Biotechnology

#### Water retting process with hemp pre-treatment: effect on the enzymatic activities and microbial populations dynamic

Valeria Ventrino<sup>1,2,§,\*</sup>, Fatima Ezzahra Chouyia<sup>1,§</sup>, Ida Romano<sup>1</sup>, Mauro Mori<sup>3</sup>, Olimpia Pepe<sup>1,2</sup>

<sup>1</sup> Department of Agricultural Sciences, Division of Microbiology, University of Naples Federico II, Naples, Italy

<sup>2</sup> Force on Microbiome Studies, University of Naples Federico II, Naples, Italy

<sup>3</sup> Department of Agricultural Sciences, Division of Plant Biology and Crop Science, University of Naples Federico II, Naples, Italy

\* Corresponding author: Valeria Ventrino; e-mail: valeria.ventorino@unina.it; Phone: +39(0)812539404

§V Ventrino and FE Chouyia contributed equally to this work and share first authorship.

**Table S1.** Analysis of Variance of Shannon Index for bacteria (A), and fungi (B) in the different biosystems during hemp retting process.

| <b>A) Bacteria</b>                      | <b>df</b> | <b>Sum Sq</b> | <b>Mean Sq</b> | <b>F value</b> | <b>Pr(&gt;F)</b> |     |
|-----------------------------------------|-----------|---------------|----------------|----------------|------------------|-----|
| Field retting time                      | 3         | 3548.5        | 1182.85        | 41.2392        | 2.587e-12        | *** |
| Water retting time                      | 4         | 5823.1        | 1455.77        | 50.7545        | 3.772e-15        | *** |
| Field retting time : Water retting time | 12        | 2537.3        | 211.44         | 7.3718         | 6.747e-07        | *** |
| <b>B) Fungi</b>                         | <b>df</b> | <b>Sum Sq</b> | <b>Mean Sq</b> | <b>F value</b> | <b>Pr(&gt;F)</b> |     |
| Field retting time                      | 3         | 244.49        | 81.496         | 41.6448        | 2.233e-12        | *** |
| Water retting time                      | 4         | 846.23        | 211.558        | 108.1068       | < 2.2e-16        | *** |
| Field retting time : Water retting time | 12        | 84.93         | 7.077          | 3.6166         | 0.001061         | **  |

Signif. codes: 0 '\*\*\*' 0.001 '\*\*' 0.01 '\*' 0.05 '.' 0.1 ' ' 1

**Table S2.** Output of PERMANOVA analysis for bacteria (A) and fungi (B) in the different biosystems during hemp retting process.

| <b>A) Bacteria</b>                                            |                      | <b>Df</b> | <b>SumsOfSqs</b> | <b>R2</b> | <b>F</b> | <b>Pr(&gt;F)</b> |     |
|---------------------------------------------------------------|----------------------|-----------|------------------|-----------|----------|------------------|-----|
| Permutation free                                              | Field retting time   | 3         | 8.5656           | 0.40849   | 180.509  | 0.001            | *** |
|                                                               | Water retting time   | 4         | 6.4659           | 0.30836   | 102.195  | 0.001            | *** |
|                                                               | Field retting time : | 12        | 5.3045           | 0.25297   | 27.947   | 0.001            | *** |
|                                                               | Water retting time   |           |                  |           |          |                  |     |
| <b>B) Fungi</b>                                               |                      | <b>Df</b> | <b>SumsOfSqs</b> | <b>R2</b> | <b>F</b> | <b>Pr(&gt;F)</b> |     |
| Permutation free                                              | Field retting time   | 3         | 6.3118           | 0.29842   | 75.993   | 0.001            | *** |
|                                                               | Water retting time   | 4         | 6.5080           | 0.30769   | 58.766   | 0.001            | *** |
|                                                               | Field retting time : | 12        | 7.2235           | 0.34152   | 21.742   | 0.001            | *** |
|                                                               | Water retting time   |           |                  |           |          |                  |     |
| Signif. codes: 0 '***' 0.001 '**' 0.01 '*' 0.05 '.' 0.1 ' ' 1 |                      |           |                  |           |          |                  |     |
